# Supplementary material
Source: PubMed Central journal article supplement (PMC2048719)

**A**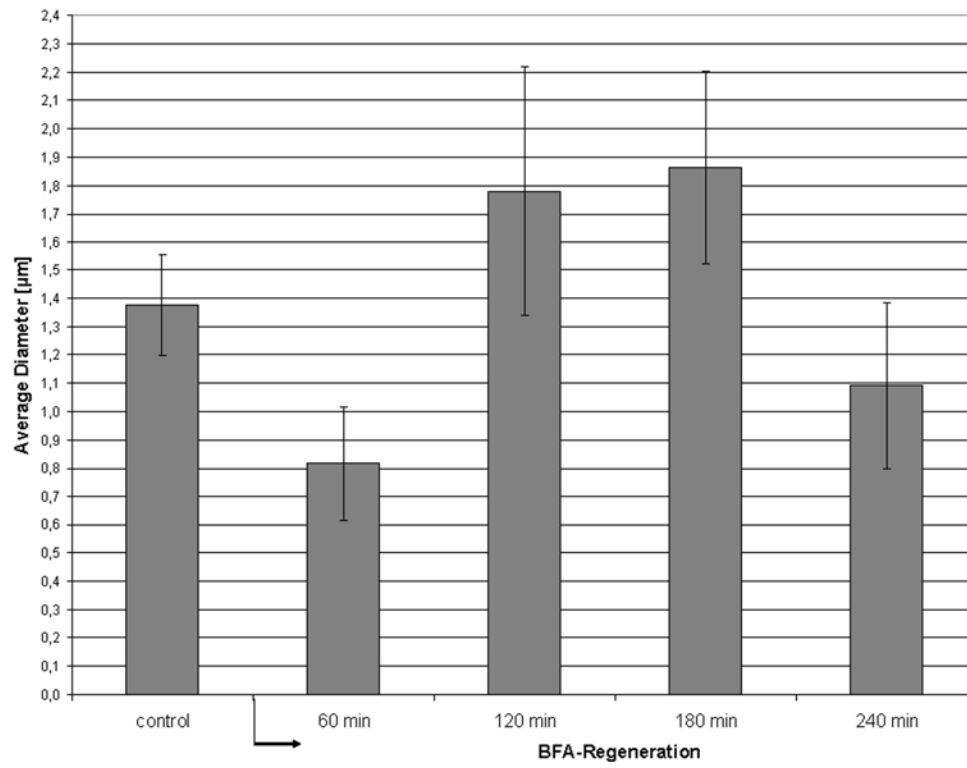**B**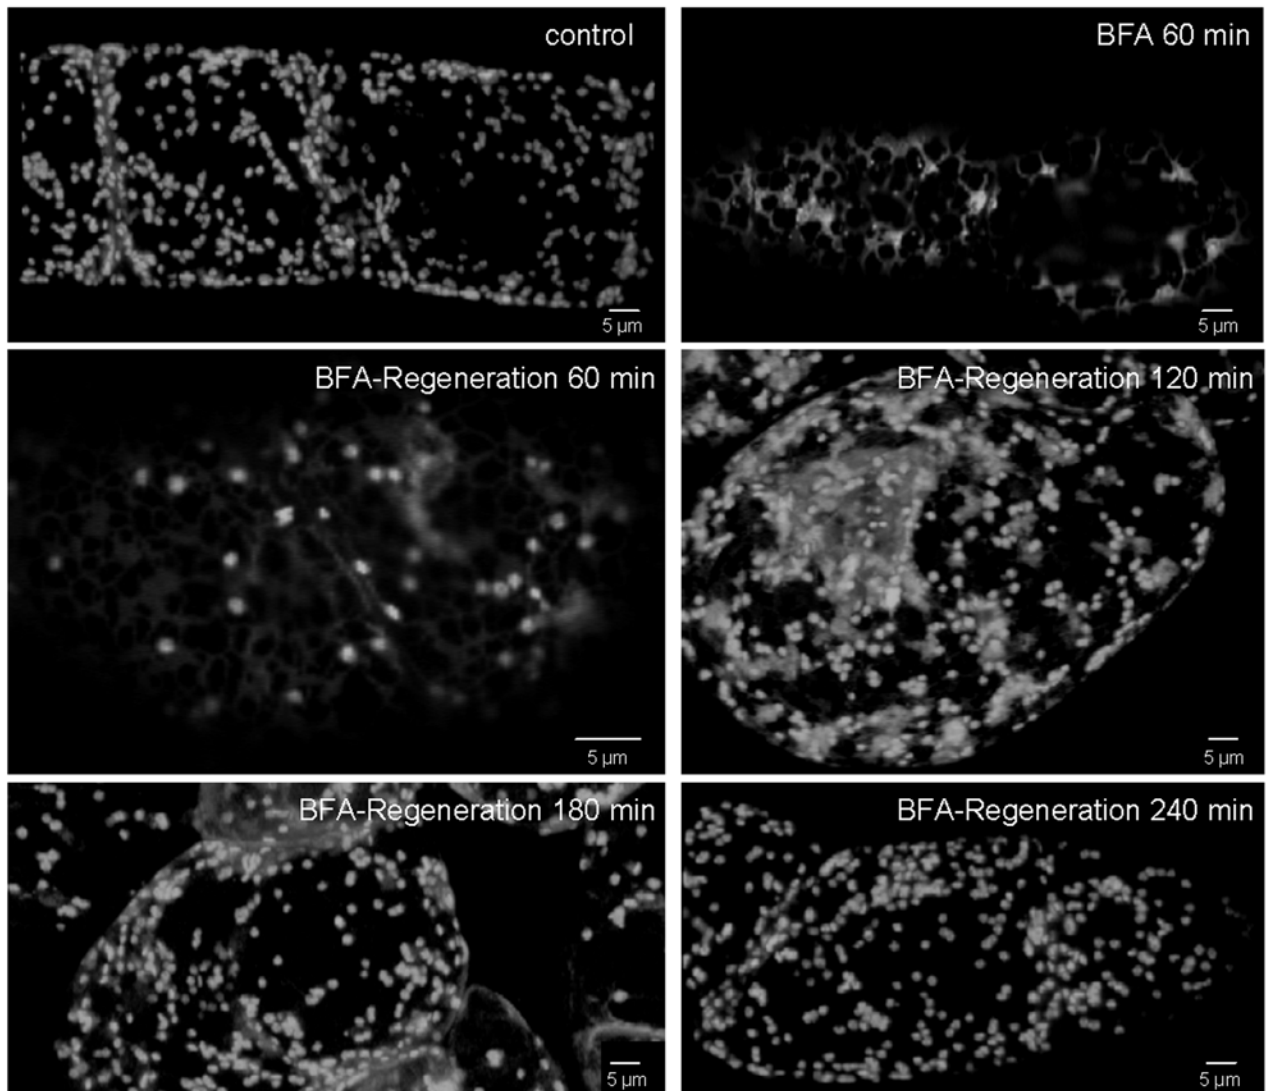

Supplement: plntphys_pp.107.104919_1.pdf [file plntphys_pp.107.104919_1.pdf]

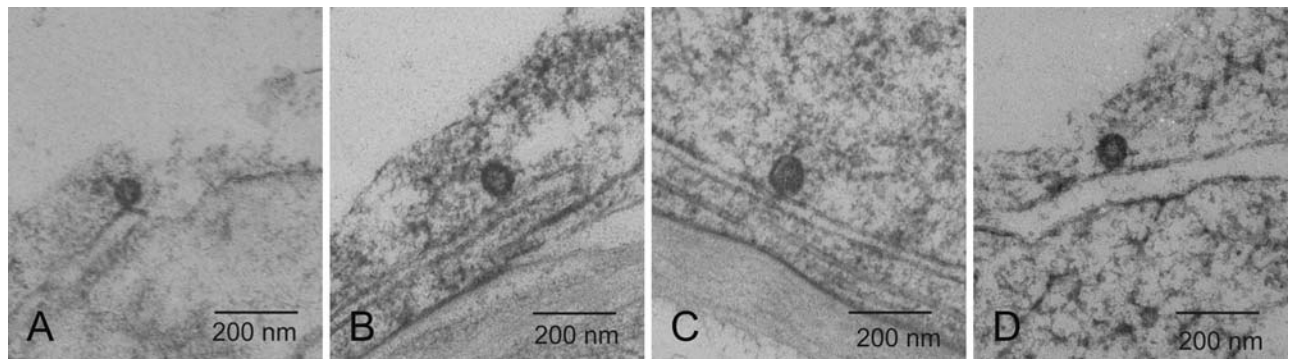

Supplement: plntphys_pp.107.104919_2.pdf [file plntphys_pp.107.104919_2.pdf]

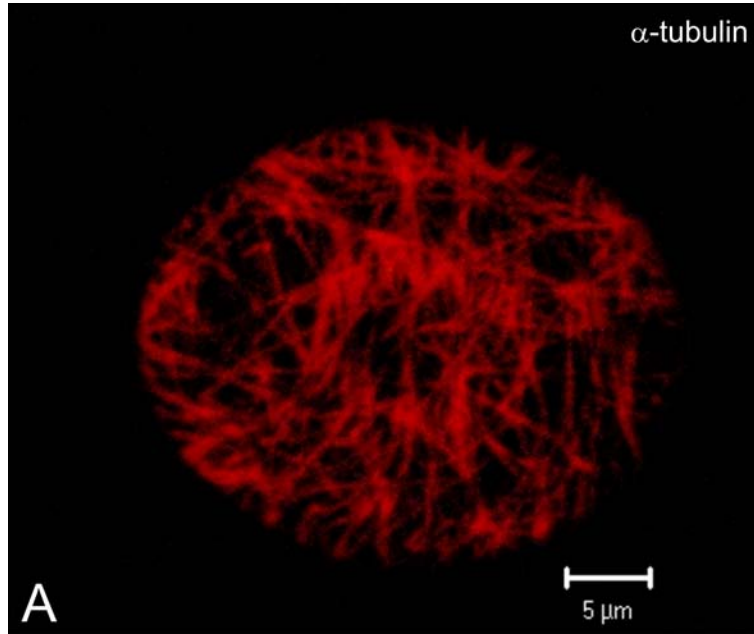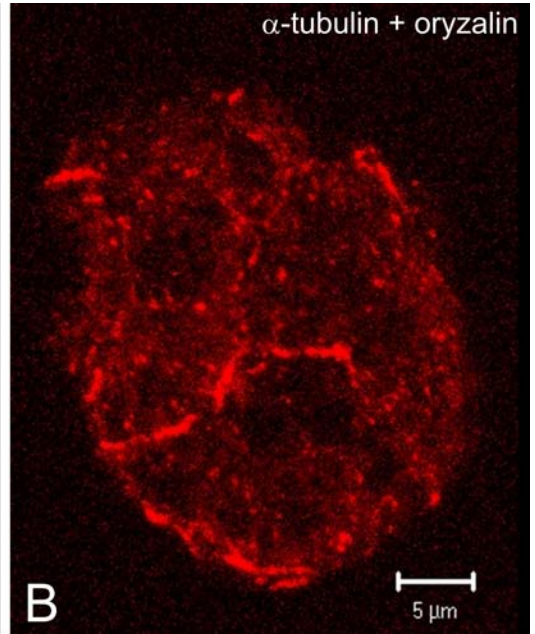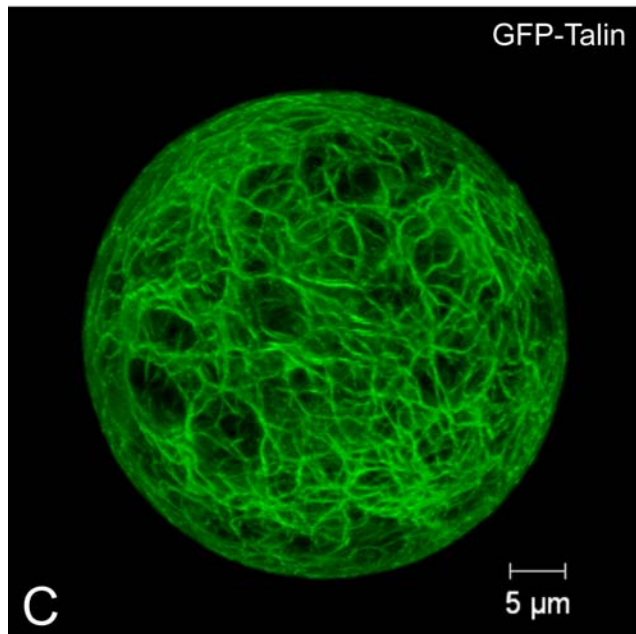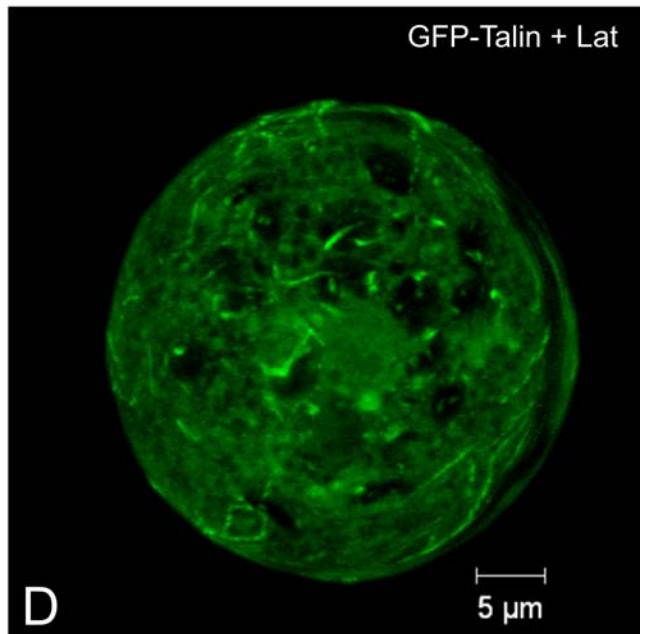

Supplement: plntphys_pp.107.104919_3.pdf [file plntphys_pp.107.104919_3.pdf]

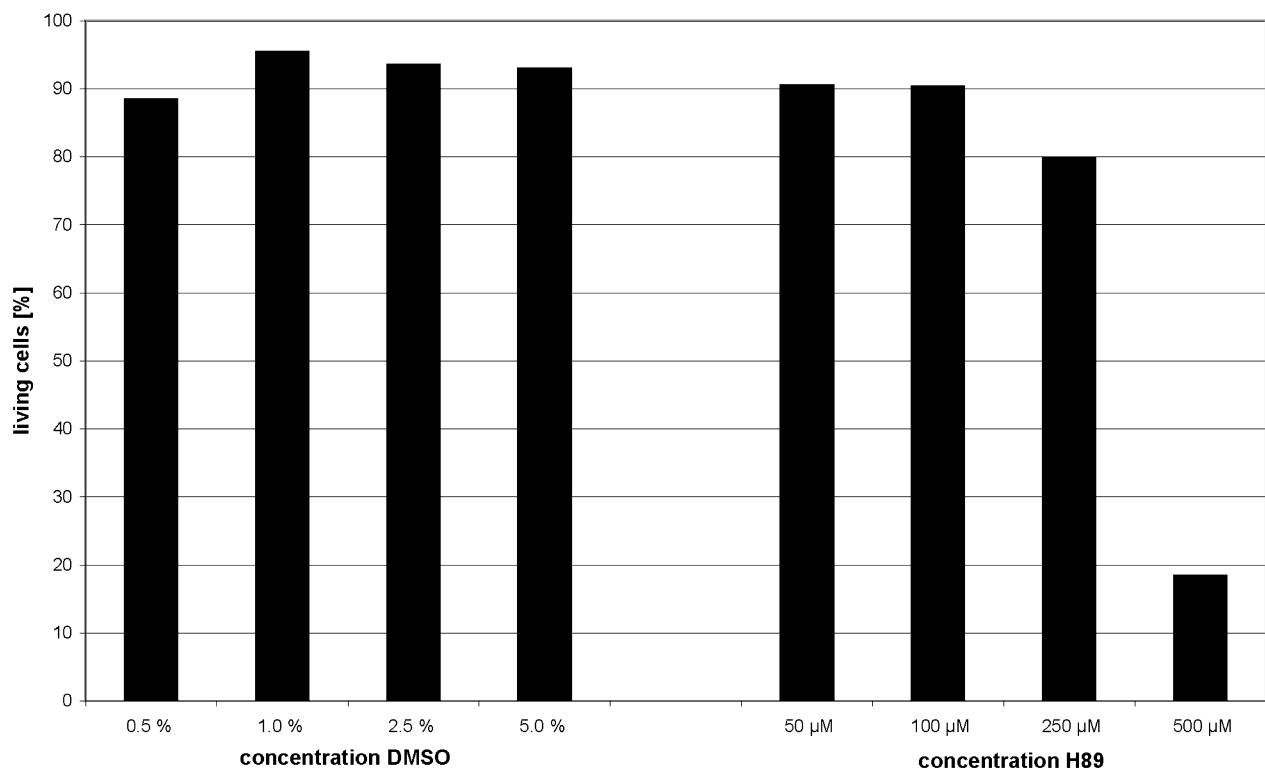

Supplement: plntphys_pp.107.104919_4.pdf [file plntphys_pp.107.104919_4.pdf]
